# Supplementary material for: Ontogenetic changes in cortical bone vascular microstructure in the domestic duck (Anas platyrhynchos) and ring‐necked pheasant (Phasianus colchicus)
Source: PubMed Central journal article supplement (PMC9644950; doi:10.1111/joa.13741), 2022-08-24
Supplement: JOA-241-1371-s001.pdf [file JOA-241-1371-s001.pdf]

## **Supplementary material**

### **Supplementary Methods**

Scans were obtained at one of three beamtimes, two at SLS Tomcat, the other at DLS I13-2.

For the first SLS Tomcat session, four samples were scanned as a trial at high resolution (0.65  $\mu\text{m}$  voxel size), but this was decreased for later experiments to give a larger field of view (See table S1). During analyses, the pixels were converted to  $\mu\text{m}$  so that absolute measurements are comparable.

For DLS datasets, and 0.65 voxel size SLS datasets, scans were slightly noisier than 1.6  $\mu\text{m}$  voxel size SLS datasets, so a Gaussian blur (1 pixel kernel size) was applied before thresholding. Ideally, the same image processing would be applied to both sets of scans, but given the differences in scan quality, it was not possible to find a workflow which was optimised for both.

Images were binarised using a minimum cross entropy thresholding algorithm (Li and Tam, 1998). The bone volume was separated from small image artefacts and noise by a single-voxel erosion and dilation, followed by a component labelling process to remove all except the largest object (*i.e.*, the cortical bone tissue), resulting in a cleaned dataset. The pores within the bone cortex were filled by dilation and erosion operations to create a solid cortical mask. This mask was used to define the edges of the canal network and to extract the intracortical pores (intracortical canals and osteocyte lacunae) by applying an AND function with the inverted cleaned dataset or in other words, by applying the mask to the inverted cleaned dataset that represents the intracortical pores, the medullary cavity and the space around the respective long bone. Intracortical microstructures with volumes of 50-500  $\mu\text{m}^3$  were

considered to be osteocyte lacunae (D'Emic and Benson, 2013) and excluded, while features with volumes  $>1000 \mu\text{m}^3$  were classified as vascular canals.

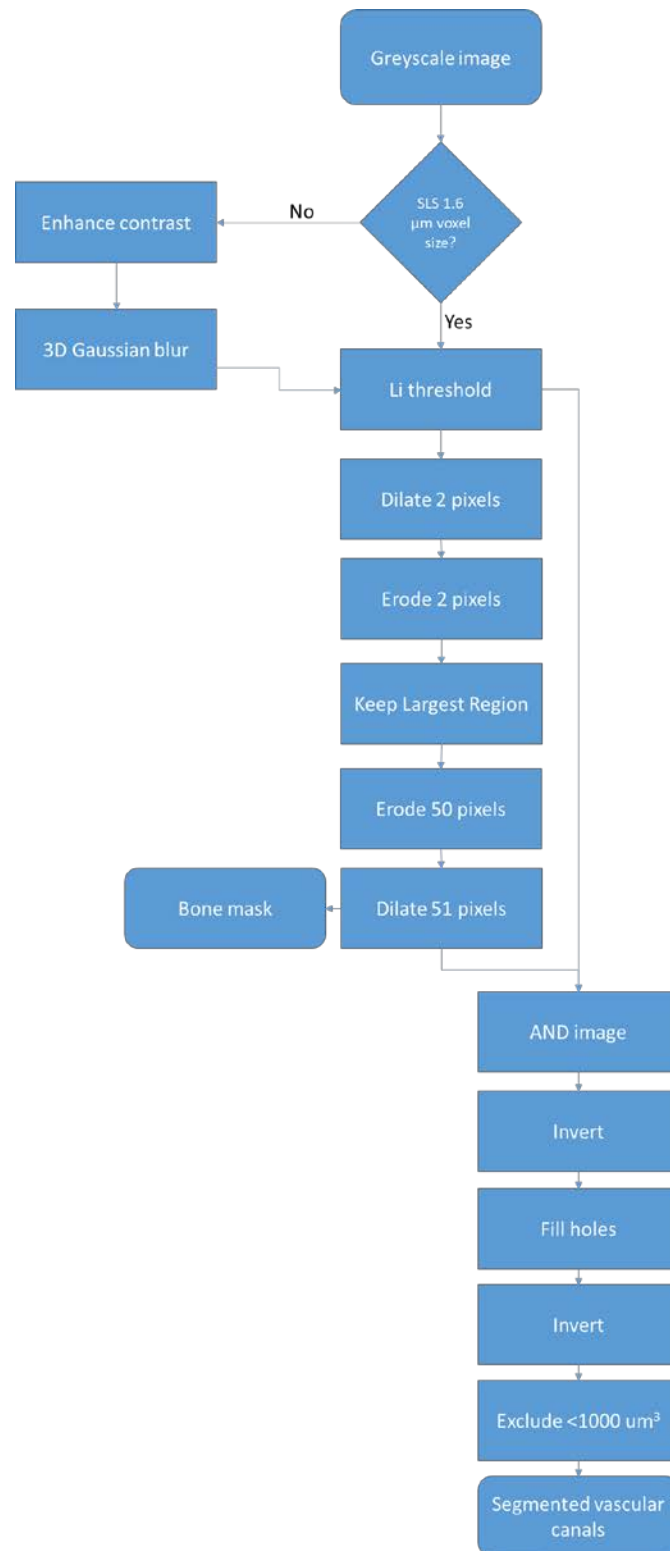

Figure S1: Image processing workflow for segmentation of intracortical vascular canals.

Table S1: Summary of duck tibiotarsus samples imaged during two synchrotron beamtimes.

| Duck ID | Mass (g) | Age (days) | Bone        | Beamline   | Voxel size ( $\mu\text{m}$ ) | Binning | Final voxel size ( $\mu\text{m}$ ) |
|---------|----------|------------|-------------|------------|------------------------------|---------|------------------------------------|
| 2       | 39       | 1          | Tibiotarsus | SLS Tomcat | 0.65                         | 2x      | 1.3                                |
| 4       | 66       | 2.07       | Tibiotarsus | SLS Tomcat | 0.65                         | 2x      | 1.3                                |
| 7       | 67       | 2.11       | Tibiotarsus | SLS Tomcat | 1.6                          | n/a     | 1.6                                |
| 5       | 84       | 2.79       | Tibiotarsus | SLS Tomcat | 1.6                          | n/a     | 1.6                                |
| 6       | 108      | 3.74       | Tibiotarsus | SLS Tomcat | 1.6                          | n/a     | 1.6                                |
| 9       | 119      | 4.18       | Tibiotarsus | SLS Tomcat | 1.6                          | n/a     | 1.6                                |
| 3       | 121      | 4.26       | Tibiotarsus | SLS Tomcat | 0.65                         | 2x      | 1.3                                |
| 1       | 253      | 9.50       | Tibiotarsus | SLS Tomcat | 0.65                         | 2x      | 1.3                                |
| 21      | 392      | 15.02      | Tibiotarsus | SLS Tomcat | 1.6                          | n/a     | 1.6                                |
| 14      | 401      | 15.38      | Tibiotarsus | SLS Tomcat | 1.6                          | n/a     | 1.6                                |
| 10      | 469      | 18.08      | Tibiotarsus | SLS Tomcat | 1.6                          | n/a     | 1.6                                |
| 11      | 492      | 18.00      | Tibiotarsus | SLS Tomcat | 1.6                          | n/a     | 1.6                                |
| 12      | 624      | 24.24      | Tibiotarsus | SLS Tomcat | 1.6                          | n/a     | 1.6                                |
| 20      | 525      | 20.31      | Tibiotarsus | SLS Tomcat | 1.6                          | n/a     | 1.6                                |
| 22      | 585      | 22.69      | Tibiotarsus | SLS Tomcat | 1.6                          | n/a     | 1.6                                |
| 23      | 530      | 20.51      | Tibiotarsus | SLS Tomcat | 1.6                          | n/a     | 1.6                                |
| 13      | 1071     | 42         | Tibiotarsus | SLS Tomcat | 1.6                          | n/a     | 1.6                                |
| 18      | 1900     | 90         | Tibiotarsus | SLS Tomcat | 1.6                          | n/a     | 1.6                                |
| 16      | 1180     | 120        | Tibiotarsus | SLS Tomcat | 1.6                          | n/a     | 1.6                                |

Table S2: Summary of duck humerus samples imaged during two synchrotron beamtimes.

| Duck ID | Mass | Age   | Bone    | Beamline | Voxel size ( $\mu\text{m}$ ) | Binning | Final voxel size ( $\mu\text{m}$ ) |
|---------|------|-------|---------|----------|------------------------------|---------|------------------------------------|
| 2       | 39   | 1     | Humerus | SLS      | 1.6                          | n/a     | 1.6                                |
| 4       | 66   | 2.07  | Humerus | SLS      | 1.6                          | n/a     | 1.6                                |
| 7       | 67   | 2.11  | Humerus | SLS      | 1.6                          | n/a     | 1.6                                |
| 5       | 108  | 2.79  | Humerus | SLS      | 1.6                          | n/a     | 1.6                                |
| 6       | 84   | 3.74  | Humerus | SLS      | 1.6                          | n/a     | 1.6                                |
| 9       | 119  | 4.18  | Humerus | SLS      | 1.6                          | n/a     | 1.6                                |
| 3       | 121  | 4.26  | Humerus | SLS      | 1.6                          | n/a     | 1.6                                |
| 1       | 253  | 9.50  | Humerus | SLS      | 1.6                          | n/a     | 1.6                                |
| 21      | 392  | 15.02 | Humerus | SLS      | 1.6                          | n/a     | 1.6                                |
| 14      | 401  | 15.38 | Humerus | SLS      | 1.6                          | n/a     | 1.6                                |
| 10      | 469  | 18.08 | Humerus | SLS      | 1.6                          | n/a     | 1.6                                |
| 11      | 492  | 18.00 | Humerus | SLS      | 1.6                          | n/a     | 1.6                                |
| 12      | 624  | 24.24 | Humerus | SLS      | 1.6                          | n/a     | 1.6                                |
| 20      | 525  | 20.31 | Humerus | SLS      | 1.6                          | n/a     | 1.6                                |

|    |      |       |         |     |     |     |     |
|----|------|-------|---------|-----|-----|-----|-----|
| 22 | 585  | 22.69 | Humerus | SLS | 1.6 | n/a | 1.6 |
| 23 | 530  | 20.51 | Humerus | SLS | 1.6 | n/a | 1.6 |
| 13 | 1071 | 42    | Humerus | DLS | 0.8 | 2x  | 1.6 |
| 15 | 1181 | 120   | Humerus | SLS | 1.6 | n/a | 1.6 |
| 16 | 1180 | 120   | Humerus | SLS | 1.6 | n/a | 1.6 |
| 19 | 1695 | 120   | Humerus | SLS | 1.6 | n/a | 1.6 |

Table S3: Summary of duck femur samples imaged during two synchrotron beamtimes.

| Duck ID | Mass | Age   | Bone  | Beamline | Voxel size ( $\mu\text{m}$ ) | Binning | Final voxel size ( $\mu\text{m}$ ) |
|---------|------|-------|-------|----------|------------------------------|---------|------------------------------------|
| 2       | 39   | 1     | Femur | SLS      | 1.6                          | n/a     | 1.6                                |
| 4       | 66   | 2.07  | Femur | SLS      | 1.6                          | n/a     | 1.6                                |
| 7       | 67   | 2.11  | Femur | SLS      | 1.6                          | n/a     | 1.6                                |
| 5       | 108  | 2.79  | Femur | SLS      | 1.6                          | n/a     | 1.6                                |
| 6       | 84   | 3.74  | Femur | SLS      | 1.6                          | n/a     | 1.6                                |
| 9       | 119  | 4.18  | Femur | SLS      | 1.6                          | n/a     | 1.6                                |
| 3       | 121  | 4.26  | Femur | SLS      | 1.6                          | n/a     | 1.6                                |
| 1       | 253  | 9.50  | Femur | SLS      | 1.6                          | n/a     | 1.6                                |
| 21      | 392  | 15.02 | Femur | SLS      | 1.6                          | n/a     | 1.6                                |
| 14      | 401  | 15.38 | Femur | SLS      | 1.6                          | n/a     | 1.6                                |
| 10      | 469  | 18.08 | Femur | SLS      | 1.6                          | n/a     | 1.6                                |
| 11      | 492  | 18.00 | Femur | SLS      | 1.6                          | n/a     | 1.6                                |
| 12      | 624  | 24.24 | Femur | SLS      | 1.6                          | n/a     | 1.6                                |
| 20      | 525  | 20.31 | Femur | SLS      | 1.6                          | n/a     | 1.6                                |
| 22      | 585  | 22.69 | Femur | SLS      | 1.6                          | n/a     | 1.6                                |
| 23      | 530  | 20.51 | Femur | SLS      | 1.6                          | n/a     | 1.6                                |
| 13      | 1071 | 42    | Femur | SLS      | 1.6                          | n/a     | 1.6                                |
| 15      | 1181 | 120   | Femur | SLS      | 1.6                          | n/a     | 1.6                                |
| 16      | 1180 | 120   | Femur | SLS      | 1.6                          | n/a     | 1.6                                |
| 19      | 1695 | 120   | Femur | SLS      | 1.6                          | n/a     | 1.6                                |

Table S4: Summary of pheasant femur samples imaged at Diamond Light Source.

| Pheasant ID | Mass (g) | Age | Bone  | Beamline | Voxel size ( $\mu\text{m}$ ) | Binning | Final voxel size ( $\mu\text{m}$ ) |
|-------------|----------|-----|-------|----------|------------------------------|---------|------------------------------------|
| 2a          | 67.5     | 14  | Femur | DLS      | 0.8                          | 2x      | 1.6                                |
| 2b          | 67       | 14  | Femur | DLS      | 0.8                          | 2x      | 1.6                                |
| 2c          | 67.6     | 14  | Femur | DLS      | 0.8                          | 2x      | 1.6                                |
| 3a          | 90       | 21  | Femur | DLS      | 0.8                          | 2x      | 1.6                                |
| 5a          | 250      | 35  | Femur | DLS      | 0.8                          | 2x      | 1.6                                |
| 5b          | 300      | 35  | Femur | DLS      | 0.8                          | 2x      | 1.6                                |
| 5c          | 269      | 35  | Femur | DLS      | 0.8                          | 2x      | 1.6                                |

|    |       |    |       |     |     |    |     |
|----|-------|----|-------|-----|-----|----|-----|
| 6a | 204.8 | 42 | Femur | DLS | 0.8 | 2x | 1.6 |
| 6b | 292.6 | 42 | Femur | DLS | 0.8 | 2x | 1.6 |
| 6c | 306.7 | 42 | Femur | DLS | 0.8 | 2x | 1.6 |

Table S5: Summary of pheasant humerus samples imaged at Diamond Light Source.

| Pheasant ID | Mass (g) | Age   |         | Beamline | Voxel size (μm) | Binning | Final voxel size (μm) |
|-------------|----------|-------|---------|----------|-----------------|---------|-----------------------|
|             |          |       | Bone    |          |                 |         |                       |
| 2a          | 67.5     | 1     | Humerus | DLS      | 0.8             | 2x      | 1.6                   |
| 2b          | 67       | 2.07  | Humerus | DLS      | 0.8             | 2x      | 1.6                   |
| 2c          | 67.6     | 2.11  | Humerus | DLS      | 0.8             | 2x      | 1.6                   |
| 3a          | 90       | 2.79  | Humerus | DLS      | 0.8             | 2x      | 1.6                   |
| 5a          | 250      | 3.74  | Humerus | DLS      | 0.8             | 2x      | 1.6                   |
| 5b          | 300      | 4.18  | Humerus | DLS      | 0.8             | 2x      | 1.6                   |
| 5c          | 269      | 4.26  | Humerus | DLS      | 0.8             | 2x      | 1.6                   |
| 6a          | 204.8    | 9.50  | Humerus | DLS      | 0.8             | 2x      | 1.6                   |
| 6c          | 306.7    | 15.38 | Humerus | DLS      | 0.8             | 2x      | 1.6                   |

Table S6: Summary of pheasant tibiotarsus samples imaged at Diamond Light Source.

| Pheasant ID | Mass (g) | Age |             | Beamline | Voxel size (μm) | Binning | Final voxel size (μm) |
|-------------|----------|-----|-------------|----------|-----------------|---------|-----------------------|
|             |          |     | Bone        |          |                 |         |                       |
| 2a          | 67.5     | 14  | Tibiotarsus | DLS      | 0.8             | 2x      | 1.6                   |
| 2b          | 67       | 14  | Tibiotarsus | DLS      | 0.8             | 2x      | 1.6                   |
| 2c          | 67.6     | 14  | Tibiotarsus | DLS      | 0.8             | 2x      | 1.6                   |
| 3a          | 90       | 21  | Tibiotarsus | DLS      | 0.8             | 2x      | 1.6                   |
| 5a          | 250      | 35  | Tibiotarsus | DLS      | 0.8             | 2x      | 1.6                   |
| 5b          | 300      | 35  | Tibiotarsus | DLS      | 0.8             | 2x      | 1.6                   |
| 5c          | 269      | 35  | Tibiotarsus | DLS      | 0.8             | 2x      | 1.6                   |
| 6a          | 204.8    | 42  | Tibiotarsus | DLS      | 0.8             | 2x      | 1.6                   |
| 6b          | 292.6    | 42  | Tibiotarsus | DLS      | 0.8             | 2x      | 1.6                   |
| 6c          | 306.7    | 42  | Tibiotarsus | DLS      | 0.8             | 2x      | 1.6                   |

| Scan               | Mass | Age  | Duck ID  | Bone | Flen     | Tlen     | Hlen     |
|--------------------|------|------|----------|------|----------|----------|----------|
| 20160807_1249_KW_1 |      | 39   | 1        | 2 f  | 1.765944 | 3.029688 | 1.197792 |
| 20160807_SLS       |      | 39   | 1        | 2 h  | 1.765944 | 3.029688 | 1.197792 |
| D2TBoneVt_SLS      |      | 39   | 1        | 2 t  | 1.765944 | 3.029688 | 1.197792 |
| 20160807_SLS       |      | 66   | 2.072745 | 4 f  | 2.056    | 3.832    | 1.256    |
| 20160807_SLS       |      | 66   | 2.072745 | 4 h  | 2.056    | 3.832    | 1.256    |
| D4TBoneVt_SLS      |      | 66   | 2.072745 | 4 t  | 2.056    | 3.832    | 1.256    |
| 20160807_SLS       |      | 67   | 2.112475 | 7 t  | 2.056    | 3.832    | 1.256    |
| 20160807_SLS       |      | 67   | 2.112475 | 7 f  | 2.056    | 3.832    | 1.256    |
| 20160807_SLS       |      | 67   | 2.112475 | 7 h  | 2.056    | 3.832    | 1.256    |
| 20160807_SLS       |      | 84   | 2.787882 | 5 f  | 2.032    | 3.888    | 1.28     |
| 20160807_SLS       |      | 108  | 2.787882 | 5 h  | 2.13516  | 3.607632 | 1.307232 |
| 20160807_SLS       |      | 84   | 2.787882 | 5 t  | 2.032    | 3.888    | 1.28     |
| 20160807_SLS       |      | 108  | 3.741398 | 6 t  | 2.13516  | 3.607632 | 1.307232 |
| 20160807_SLS       |      | 108  | 3.741398 | 6 f  | 2.13516  | 3.607632 | 1.307232 |
| 20160807_SLS       |      | 84   | 3.741398 | 6 h  | 2.032    | 3.888    | 1.28     |
| 20160807_SLS       |      | 119  | 4.178427 | 9 t  | 2.432    | 4.384    | 1.4      |
| 20160807_SLS       |      | 119  | 4.178427 | 9 f  | 2.432    | 4.384    | 1.4      |
| 20160807_SLS       |      | 119  | 4.178427 | 9 h  | 2.432    | 4.384    | 1.4      |
| 20160807_SLS       |      | 121  | 4.257886 | 3 f  | 2.304    | 4.608    | 1.288    |
| 20160807_SLS       |      | 121  | 4.257886 | 3 h  | 2.304    | 4.608    | 1.288    |
| D3TBoneVt_SLS      |      | 121  | 4.257886 | 3 t  | 2.304    | 4.608    | 1.288    |
| 20160807_SLS       |      | 253  | 9.502225 | 1 h  | 2.84724  | 5.012928 | 1.59372  |
| 20160807_SLS       |      | 253  | 9.502225 | 1 f  | 2.84724  | 5.012928 | 1.59372  |
| D1TBoneVt_SLS      |      | 253  | 9.502225 | 1 t  | 2.84724  | 5.012928 | 1.59372  |
| 20160807_SLS       |      | 392  | 15.02467 | 21 h | 4.4      | 7.1      | 2.9      |
| 20160807_SLS       |      | 392  | 15.02467 | 21 t | 4.4      | 7.1      | 2.9      |
| 20160807_SLS       |      | 392  | 15.02467 | 21 f | 4.4      | 7.1      | 2.9      |
| 20160807_SLS       |      | 401  | 15.38224 | 14 h | 4.1      | 6.7      | 3.4      |
| 20160807_SLS       |      | 401  | 15.38224 | 14 t | 4.1      | 6.7      | 3.4      |
| 20160807_SLS       |      | 401  | 15.38224 | 14 f | 4.1      | 6.7      | 3.4      |
| 20160807_SLS       |      | 469  | 18.08387 | 10 h | 4.3      | 7.5      | 3.2      |
| 20160807_SLS       |      | 469  | 18.08387 | 10 t | 4.3      | 7.5      | 3.2      |
| 20160807_SLS       |      | 469  | 18.08387 | 10 f | 4.3      | 7.5      | 3.2      |
| 20160807_SLS       |      | 492  | 18.99766 | 11 t | 4.2      | 7.1      | 3.1      |
| 20160807_SLS       |      | 492  | 18.99766 | 11 h | 4.2      | 7.1      | 3.1      |
| 20160807_SLS       |      | 624  | 24.24131 | 12 h | 4.5      | 7.5      | 3.7      |
| 20160807_SLS       |      | 624  | 24.24131 | 12 t | 4.5      | 7.5      | 3.7      |
| 20160807_SLS       |      | 492  | 18.99766 | 11 f | 4.2      | 7.1      | 3.1      |
| 20160807_SLS       |      | 624  | 24.24131 | 12 f | 4.5      | 7.5      | 3.7      |
| 20160807_SLS       |      | 525  | 20.30874 | 20 h | 4.4      | 7.3      | 3.1      |
| 20160807_SLS       |      | 525  | 20.30874 | 20 t | 4.4      | 7.3      | 3.1      |
| 20160807_SLS       |      | 525  | 20.30874 | 20 f | 4.4      | 7.3      | 3.1      |
| 20160807_SLS       |      | 585  | 22.69253 | 22 h | 4.6      | 7.5      | 3.4      |
| 20160807_SLS       |      | 585  | 22.69253 | 22 t | 4.6      | 7.5      | 3.4      |
| 20160807_SLS       |      | 585  | 22.69253 | 22 f | 4.6      | 7.5      | 3.4      |
| 20160807_SLS       |      | 1071 | 42       | 13 t | 6.3      | 9.8      | 7.5      |
| 20160807_SLS       |      | 1071 | 42       | 13 f | 6.3      | 9.8      | 7.5      |
| 985290000 DLS      |      | 1071 | 42       | 13 h | 6.4      | 9.8      | 7.5      |
| 20160807_SLS       |      | 1900 | 90       | 18 t | 6.7      | 10.7     | 10.4     |

|               |      |     |      |     |      |      |
|---------------|------|-----|------|-----|------|------|
| D18FS1_Bc SLS | 1900 | 90  | 18 f | 6.7 | 10.7 | 10.4 |
| 20160807_SLS  | 1181 | 120 | 15 h | 6.4 | 10.4 | 10.8 |
| 20160807_SLS  | 1180 | 120 | 16 h | 6.1 | 10   | 10.4 |
| 20160807_SLS  | 1180 | 120 | 16 t | 6.1 | 10   | 10.4 |
| 20160807_SLS  | 1695 | 120 | 19 h | 6.2 | 10.3 | 10.4 |
| D15FS1Bor SLS | 1181 | 120 | 15 f | 6.4 | 10.4 | 10.8 |
| D16FS1Bor SLS | 1180 | 120 | 16 f | 6.1 | 10   | 10.4 |
| D19FS1Bor SLS | 1695 | 120 | 19 f | 6.2 | 10.3 | 10.4 |

| Fwid     | Twid     | Hwid     | Porosity | CorticalThi | CanalThick | SDthicknes | MaxThickn | Longln   |
|----------|----------|----------|----------|-------------|------------|------------|-----------|----------|
| 0.289512 | 0.328464 | 0.13932  | 0.315417 | 186.4768    | 25.9328    | 12.7968    | 79.4224   | 0.17954  |
| 0.289512 | 0.328464 | 0.13932  | 0.362649 | 158.8608    | 34.336     | 12.7296    | 68.7072   | 0.152255 |
| 0.289512 | 0.328464 | 0.13932  | 0.222926 | 373.536     | 30.6       | 13.144     | 67.8816   | 0.430194 |
| 0.192    | 0.1944   | 0.1216   | 0.230936 | 122.24      | 27.608     | 11.064     | 65.6592   | 0.111251 |
| 0.192    | 0.1944   | 0.1216   | 0.120972 | 67.4176     | 18.9968    | 6.0048     | 31.6784   | 0.27068  |
| 0.192    | 0.1944   | 0.1216   | 0.329008 | 328.5504    | 27.3744    | 13.2064    | 68.3328   | 0.493126 |
| 0.192    | 0.1944   | 0.1216   | 0.305252 | 336.9664    | 21.808     | 7.2848     | 46.592    | 0.545656 |
| 0.192    | 0.1944   | 0.1216   | 0.383442 | 342.1376    | 31.2416    | 14.248     | 86.9312   | 0.285249 |
| 0.192    | 0.1944   | 0.1216   | 0.154941 | 103.7184    | 22.2928    | 10.4544    | 48.8464   | 0.386642 |
| 0.1976   | 0.2152   | 0.1176   | 0.354922 | 417.5808    | 32.8208    | 11.8368    | 73.6      | 0.17509  |
| 0.338616 | 0.384984 | 0.151776 | 0.470907 | 264.5696    | 48.5104    | 19.8032    | 91.7456   | 0.210418 |
| 0.1976   | 0.2152   | 0.1176   | 0.394488 | 439.552     | 34.3264    | 12.7952    | 67.9584   | 0.427046 |
| 0.338616 | 0.384984 | 0.151776 | 0.398573 | 445.2928    | 35.7168    | 14.7312    | 72.76     | 0.318999 |
| 0.338616 | 0.384984 | 0.151776 | 0.401494 | 427.0272    | 35.2608    | 14.2848    | 82.1472   | 0.115811 |
| 0.1976   | 0.2152   | 0.1176   | 0.193351 | 104.6912    | 19.272     | 6.2304     | 35.0544   | 0.065334 |
| 0.2416   | 0.3      | 0.1416   | 0.440936 | 496.48      | 35.9264    | 14.0992    | 73.8784   | 0.322328 |
| 0.2416   | 0.3      | 0.1416   | 0.342142 | 368.1984    | 26.3552    | 10.1248    | 57.3328   | 0.149392 |
| 0.2416   | 0.3      | 0.1416   | 0.413495 | 200.9792    | 37.7776    | 14.3104    | 69.0784   | 0.185537 |
| 0.312    | 0.236    | 0.1544   | 0.402113 | 469.2032    | 32.6784    | 12.5232    | 74.9792   | 0.131604 |
| 0.312    | 0.236    | 0.1544   | 0.360208 | 141.088     | 31.552     | 13.896     | 63.84     | 0.133225 |
| 0.312    | 0.236    | 0.1544   | 0.33703  | 511.0464    | 35.3888    | 13.1744    | 78.384    | 0.493126 |
| 0.330336 | 0.490752 | 0.215496 | 0.364114 | 292.896     | 31.6208    | 11.048     | 68.184    | 0.27329  |
| 0.330336 | 0.490752 | 0.215496 | 0.383769 | 880.2048    | 36.328     | 14.8352    | 76.1312   | 0.140159 |
| 0.330336 | 0.490752 | 0.215496 | 0.266346 | 589.1392    | 34.6672    | 18.04      | 107.5696  | 0.445037 |
| 0.4      | 0.4      | 0.3      | 0.333855 | 243.9232    | 46.1072    | 29.5712    | 115.9088  | 0.335159 |
| 0.4      | 0.4      | 0.3      | 0.373339 | 839.4368    | 42.2672    | 15.0848    | 81.8352   | 0.476915 |
| 0.4      | 0.4      | 0.3      | 0.26288  | 587.7184    | 31.088     | 14.0816    | 72.2656   | 0.223535 |
| 0.4      | 0.3      | 0.2      | 0.448151 | 338.7776    | 34.984     | 12.2896    | 77.3984   | 0.179739 |
| 0.4      | 0.3      | 0.2      | 0.380942 | 869.4464    | 32.5264    | 13.7776    | 100.6352  | 0.303544 |
| 0.4      | 0.3      | 0.2      | 0.269659 | 628.672     | 24.4752    | 9.5344     | 74.7728   | 0.160947 |
| 0.4      | 0.4      | 0.2      | 0.327937 | 323.5776    | 29.32      | 11.2384    | 74.704    | 0.32095  |
| 0.4      | 0.4      | 0.2      | 0.351417 | 805.7856    | 40.8976    | 15.2256    | 111.6336  | 0.342908 |
| 0.4      | 0.4      | 0.2      | 0.225679 | 675.072     | 25.4384    | 9.7312     | 65.9696   | 0.1459   |
| 0.3      | 0.4      | 0.3      | 0.312676 | 725.9968    | 39.56      | 27.9168    | 107.9504  | 0.627462 |
| 0.3      | 0.4      | 0.3      | 0.329429 | 251.2832    | 30.5328    | 12.1584    | 60.7152   | 0.265938 |
| 0.5      | 0.4      | 0.3      | 0.354353 | 403.3216    | 32.7696    | 17.0128    | 100.8896  | 0.24777  |
| 0.5      | 0.4      | 0.3      | 0.350048 | 1035.744    | 44.3696    | 19.2304    | 109.4096  | 0.403148 |
| 0.3      | 0.4      | 0.3      | 0.230171 | 561.1584    | 27.3536    | 13.3184    | 75.8608   | 0.138525 |
| 0.5      | 0.4      | 0.3      | 0.343908 | 1011.462    | 37.6816    | 15.184     | 86.9312   | 0.159553 |
| 0.4      | 0.4      | 0.3      | 0.349077 | 208.1024    | 26.4512    | 10.6512    | 65.8928   | 0.177743 |
| 0.4      | 0.4      | 0.3      | 0.324138 | 889.4912    | 30.952     | 10.5888    | 63.84     | 0.413321 |
| 0.4      | 0.4      | 0.3      | 0.326495 | 787.6288    | 31.5504    | 11.8784    | 98.5792   | 0.171153 |
| 0.5      | 0.4      | 0.3      | 0.376322 | 405.0304    | 35.4448    | 13.7072    | 84.9664   | 0.155724 |
| 0.5      | 0.4      | 0.3      | 0.344801 | 1025.536    | 42.136     | 16.9904    | 86.1024   | 0.402995 |
| 0.5      | 0.4      | 0.3      | 0.254005 | 709.2224    | 28.216     | 12.1824    | 76.6      | 0.122619 |
| 0.6      | 0.6      | 0.6      | 0.101099 | 593.7856    | 24.1904    | 15.6704    | 86.4592   | 0.274505 |
| 0.6      | 0.6      | 0.6      | 0.160151 | 705.8688    | 26.6032    | 13.408     | 68.3328   | 0.08997  |
| 0.6      | 0.6      | 0.6      | 0.434347 | 795.8144    | 18.696     | 9.9728     | 65.6592   | 0.292258 |
| 0.7      | 0.6      | 0.85     | 0.04367  | 681.28      | 14.064     | 4.1056     | 27.3408   | 0.489202 |



|     |     |      |          |          |         |         |         |          |
|-----|-----|------|----------|----------|---------|---------|---------|----------|
| 0.7 | 0.6 | 0.85 | 0.031121 | 490.048  | 10.1344 | 3.4592  | 27.7136 | 0.361861 |
| 0.7 | 0.7 | 0.9  | 0.014102 | 755.3984 | 7.4176  | 2.7296  | 25.6    | 0.168839 |
| 0.6 | 0.7 | 0.9  | 0.011269 | 683.6032 | 8.9408  | 3.6576  | 27.528  | 0.386107 |
| 0.6 | 0.7 | 0.9  | 0.018228 | 766.6688 | 15.0528 | 10.16   | 49.6768 | 0.377336 |
| 0.8 | 0.7 | 0.9  | 0.029602 | 748.1408 | 13.1968 | 10.8064 | 68.0336 | 0.176765 |
| 0.7 | 0.7 | 0.9  | 0.017514 | 592.5632 | 13.4416 | 8.4944  | 46.7024 | 0.25068  |
| 0.6 | 0.7 | 0.9  | 0.030531 | 784.3456 | 25.6592 | 21.9312 | 88.2752 | 0.188192 |
| 0.8 | 0.7 | 0.9  | 0.03442  | 527.584  | 24.0352 | 18.3648 | 76.3312 | 0.277278 |

| Circln   | Radin    | OblIn    | SecondMoment |
|----------|----------|----------|--------------|
| 0.25228  | 0.200795 | 0.367386 | 1.462156     |
| 0.26668  | 0.085734 | 0.495332 | 0.119266     |
| 0.227784 | 0.082411 | 0.259611 | 3.67839      |
| 0.179288 | 0.351099 | 0.358362 | 0.280202     |
| 0.224186 | 0.151709 | 0.353425 | 0.040254     |
| 0.216197 | 0.073569 | 0.217108 | 0.566428     |
| 0.152871 | 0.078574 | 0.222898 | 0.573334     |
| 0.220559 | 0.162857 | 0.331335 | 0.552614     |
| 0.184852 | 0.117612 | 0.310894 | 0.056535     |
| 0.180772 | 0.229453 | 0.414685 | 0.665221     |
| 0.170924 | 0.231261 | 0.387398 | 0.213594     |
| 0.079342 | 0.064424 | 0.429188 | 0.923916     |
| 0.224336 | 0.133193 | 0.323471 | 7.018596     |
| 0.199754 | 0.249365 | 0.435069 | 4.435678     |
| 0.149424 | 0.276363 | 0.508879 | 0.051032     |
| 0.188573 | 0.160191 | 0.328908 | 3.179563     |
| 0.152905 | 0.232493 | 0.46521  | 1.281809     |
| 0.16851  | 0.236338 | 0.409615 | 0.14544      |
| 0.150599 | 0.155755 | 0.562042 | 3.53955      |
| 0.253378 | 0.030601 | 0.582795 | 0.15453      |
| 0.216197 | 0.073569 | 0.217108 | 1.365432     |
| 0.315286 | 0.090683 | 0.320741 | 0.760977     |
| 0.187463 | 0.244483 | 0.427896 | 5.566908     |
| 0.242977 | 0.078528 | 0.233458 | 18.97796     |
| 0.243903 | 0.115402 | 0.305536 | 2.021043     |
| 0.135747 | 0.087987 | 0.299351 | 11.14153     |
| 0.321638 | 0.10049  | 0.354337 | 9.44191      |
| 0.317606 | 0.149848 | 0.352807 | 0.635264     |
| 0.015166 | 0.025792 | 0.655498 | 3.851919     |
| 0.247253 | 0.143332 | 0.448468 | 9.788863     |
| 0.333177 | 0.06652  | 0.279353 | 0.620975     |
| 0.098742 | 0.055891 | 0.502459 | 10.96895     |
| 0.293859 | 0.14152  | 0.418722 | 10.14613     |
| 0.157798 | 0.045606 | 0.169133 | 10.49732     |
| 0.41407  | 0.081178 | 0.238814 | 2.066464     |
| 0.409945 | 0.070757 | 0.271529 | 2.840003     |
| 0.060125 | 0.053945 | 0.482782 | 11.88739     |
| 0.269662 | 0.171104 | 0.420709 | 3.365896     |
| 0.230326 | 0.175517 | 0.434604 | 26.82369     |
| 0.404023 | 0.124235 | 0.293999 | 1.788305     |
| 0.013912 | 0.066339 | 0.506427 | 11.37189     |
| 0.295493 | 0.137824 | 0.39553  | 10.86956     |
| 0.30776  | 0.128637 | 0.407879 | 2.847067     |
| 0.055964 | 0.035283 | 0.505759 | 11.85818     |
| 0.349504 | 0.089821 | 0.438055 | 22.6025      |
| 0.182951 | 0.173629 | 0.368915 | 37.28869     |
| 0.169582 | 0.269561 | 0.470887 | 41.86206     |
| 0.400443 | 0.056655 | 0.250644 | 45.07841     |
| 0.218938 | 0.046071 | 0.245789 | 40.91426     |

|          |          |          |          |
|----------|----------|----------|----------|
| 0.230473 | 0.13654  | 0.271127 | 53.39319 |
| 0.434127 | 0.105389 | 0.291645 | 167.6392 |
| 0.306506 | 0.088341 | 0.219046 | 155.4512 |
| 0.239123 | 0.106432 | 0.27711  | 74.01999 |
| 0.212598 | 0.137368 | 0.47327  | 166.4385 |
| 0.276528 | 0.156256 | 0.316536 | 61.73709 |
| 0.393103 | 0.179866 | 0.238839 | 44.68955 |
| 0.381145 | 0.05558  | 0.285997 | 86.87487 |

| Scan      | Mass  | Age | Age (days) | Animal | Bone | Flen | Tlen | Hlen |
|-----------|-------|-----|------------|--------|------|------|------|------|
| 98498Bone | 67.5  | 2   | 14         | a      | t    | 4.4  | 3.4  | 3.2  |
| 984990014 | 67.5  | 2   | 14         | a      | h    | 4.4  | 3.4  | 3.2  |
| 985020008 | 67.5  | 2   | 14         | a      | f    | 4.4  | 3.4  | 3.2  |
| 985070028 | 67    | 2   | 14         | b      | f    | 4.4  | 3.4  | 3.2  |
| 98508Bone | 67    | 2   | 14         | b      | t    | 4.4  | 3.4  | 3.2  |
| 985090008 | 67    | 2   | 14         | b      | h    | 4.4  | 3.4  | 3.2  |
| 98542Bone | 67.6  | 2   | 14         | c      | h    | 4.3  | 3.3  | 3.2  |
| 98559Bone | 67.6  | 2   | 14         | c      | f    | 4.3  | 3.3  | 3.2  |
| 98565Bone | 67.6  | 2   | 14         | c      | t    | 4.3  | 3.3  | 3.2  |
| 98501Bone | 90    | 3   | 21         | a      | f    | 5.4  | 4.1  | 4    |
| 985050019 | 90    | 3   | 21         | a      | h    | 5.4  | 4.1  | 4    |
| 985060045 | 90    | 3   | 21         | a      | t    | 5.4  | 4.1  | 4    |
| 984770012 | 250   | 5   | 35         | a      | t    | 7    | 5.6  | 5.3  |
| 984840017 | 250   | 5   | 35         | a      | f    | 7    | 5.6  | 5.3  |
| 984850006 | 250   | 5   | 35         | a      | h    | 7    | 5.6  | 5.3  |
| 985100002 | 300   | 5   | 35         | b      | h    | 7.7  | 5.8  | 5.4  |
| 985180011 | 300   | 5   | 35         | b      | f    | 7.7  | 5.8  | 5.4  |
| 985430009 | 269   | 5   | 35         | c      | t    | 7.4  | 5.3  | 5.4  |
| 985440011 | 269   | 5   | 35         | c      | f    | 7.4  | 5.3  | 5.4  |
| 985460017 | 269   | 5   | 35         | c      | h    | 7.4  | 5.3  | 5.4  |
| 985500005 | 269   | 5   | 35         | b      | t    | 7.7  | 5.8  | 5.4  |
| 984820015 | 204.8 | 6   | 42         | a      | f    | 7.4  | 5.4  | 5.3  |
| 984830015 | 204.8 | 6   | 42         | a      | t    | 7.4  | 5.4  | 5.3  |
| 98488Bone | 204.8 | 6   | 42         | a      | h    | 7.4  | 5.4  | 5.3  |
| 985190001 | 292.6 | 6   | 42         | b      | t    | 7.3  | 5.5  | 5.4  |
| 985470011 | 306.7 | 6   | 42         | c      | t    | 7.4  | 5.8  | 5.5  |
| 985480028 | 306.7 | 6   | 42         | c      | h    | 7.4  | 5.8  | 5.5  |
| 985490028 | 306.7 | 6   | 42         | c      | f    | 7.3  | 5.5  | 5.4  |
| 985670013 | 292.6 | 6   | 42         | b      | f    | 7.4  | 5.8  | 5.5  |

| Fwid | Twid | Hwid | Porosity | CorticalThi | CanalThick | SDthicknes | MaxThickn | Longln   |
|------|------|------|----------|-------------|------------|------------|-----------|----------|
| 0.27 | 0.25 | 0.3  | 0.197549 | 422.5344    | 19.8432    | 6.5904     | 45.2544   | 0.298049 |
| 0.27 | 0.25 | 0.3  | 0.194946 | 321.472     | 18.9104    | 7.056      | 51.2992   | 0.331106 |
| 0.27 | 0.25 | 0.3  | 0.12747  | 249.3504    | 15.5232    | 6.1152     | 38.6656   | 0.158198 |
| 0.25 | 0.2  | 0.3  | 0.170598 | 277.8752    | 6.4        | 0          | 6.4       | 0.224202 |
| 0.25 | 0.2  | 0.3  | 0.236203 | 345.0944    | 22.9664    | 9.232      | 56.0688   | 0.455752 |
| 0.25 | 0.2  | 0.3  | 0.243887 | 318.0544    | 24.4432    | 8.3424     | 51.4      | 0.183145 |
| 0.2  | 0.2  | 0.25 | 0.254502 | 360.736     | 22.2016    | 6.6096     | 45.8176   | 0.108745 |
| 0.2  | 0.2  | 0.25 | 0.134425 | 335.36      | 15.5072    | 5.5776     | 34.4656   | 0.420093 |
| 0.2  | 0.2  | 0.25 | 0.188068 | 421.5488    | 18.728     | 6.6352     | 48.9504   | 0.578058 |
| 0.3  | 0.3  | 0.4  | 0.343384 | 757.9712    | 37.8944    | 11.4608    | 49.8832   | 0.118906 |
| 0.3  | 0.3  | 0.4  | 0.271151 | 1102.464    | 30.1744    | 11.4656    | 76.0624   | 0.040145 |
| 0.3  | 0.3  | 0.4  | 0.320059 | 780.7104    | 37.2288    | 14.5184    | 79.0336   | 0.158022 |
| 0.4  | 0.45 | 0.5  | 0.188375 | 681.536     | 29.6448    | 15.5936    | 75.5904   | 0.319585 |
| 0.4  | 0.45 | 0.5  | 0.130759 | 461.44      | 22.984     | 12.1088    | 61.5536   | 0.285123 |
| 0.4  | 0.45 | 0.5  | 0.099368 | 411.072     | 22.1312    | 14.3504    | 77.5296   | 0.371671 |
| 0.5  | 0.4  | 0.5  | 0.293897 | 906.6496    | 33.7152    | 16.344     | 107.1408  | 0.070948 |
| 0.5  | 0.4  | 0.5  | 0.110866 | 430.3296    | 13.0208    | 4.3088     | 35.7776   | 0.205086 |
| 0.4  | 0.4  | 0.5  | 0.14099  | 518.6112    | 24.1248    | 11.9408    | 56.7936   | 0.508253 |
| 0.4  | 0.4  | 0.5  | 0.251989 | 776.5632    |            |            |           | 0.122144 |
| 0.4  | 0.4  | 0.5  | 0.206254 | 581.9072    | 31.8064    | 14.7936    | 71.3392   | 0.083818 |
| 0.5  | 0.4  | 0.5  | 0.179    | 754.4192    | 27.472     | 15.4912    | 75.928    | 0.205884 |
| 0.4  | 0.4  | 0.45 | 0.048667 | 263.7184    | 9.3264     | 2.4416     | 22.6272   | 0.10338  |
| 0.4  | 0.4  | 0.45 | 0.063155 | 436.8       | 13.624     | 3.9072     | 28.8      | 0.426625 |
| 0.4  | 0.4  | 0.45 | 0.017861 | 560.4992    | 8.52       | 2.1136     | 13.1936   | 0.313506 |
| 0.4  | 0.4  | 0.5  | 0.134235 | 531.7184    | 25.4848    | 13.584     | 64.8736   | 0.332635 |
| 0.4  | 0.4  | 0.4  | 0.122606 | 593.4848    | 25.7216    | 14.904     | 68.4832   | 0.254234 |
| 0.4  | 0.4  | 0.4  | 0.17844  | 403.104     | 26.7952    | 13.0304    | 67.504    | 0.302669 |
| 0.4  | 0.4  | 0.5  | 0.214203 | 477.6704    | 29.8176    | 18.1056    | 100.3808  | 0.270137 |
| 0.4  | 0.4  | 0.4  | 0.120452 | 367.04      | 22.376     | 10.6336    | 52.1904   | 0.210658 |

| Circln   | Radin    | Oblin    | SecondMoment |
|----------|----------|----------|--------------|
| 0.235989 | 0.142206 | 0.323755 | 1.549271     |
| 0.326295 | 0.058067 | 0.284532 | 2.46095      |
| 0.248215 | 0.165571 | 0.428015 | 1.456085     |
| 0.19083  | 0.18378  | 0.401188 | 1.216056     |
| 0.198142 | 0.07924  | 0.266865 | 0.640919     |
| 0.261092 | 0.148938 | 0.406825 | 2.443298     |
| 0.17503  | 0.280081 | 0.436144 | 1.426328     |
| 0.169625 | 0.076907 | 0.333375 | 0.632136     |
| 0.182352 | 0.04967  | 0.189921 | 0.697464     |
| 0.243981 | 0.186828 | 0.450285 | 3.737971     |
| 0.25697  | 0.181964 | 0.520921 | 12.05669     |
| 0.159284 | 0.286799 | 0.395895 | 3.765843     |
| 0.255444 | 0.11225  | 0.31272  | 15.37567     |
| 0.250809 | 0.11536  | 0.348708 | 8.165408     |
| 0.231207 | 0.11258  | 0.284542 | 15.72471     |
| 0.179735 | 0.284457 | 0.464859 | 25.61747     |
| 0.424887 | 0.063899 | 0.306128 | 16.2686      |
| 0.258147 | 0.035395 | 0.198206 | 8.783982     |
| 0.279778 | 0.177813 | 0.420265 | 10.80676     |
| 0.37622  | 0.130045 | 0.409917 | 20.04876     |
| 0.256667 | 0.155887 | 0.381562 | 10.67587     |
| 0.430632 | 0.087829 | 0.378159 | 5.428469     |
| 0.195331 | 0.092511 | 0.285534 | 7.876638     |
| 0.249604 | 0.147661 | 0.289229 | 13.72973     |
| 0.239684 | 0.10688  | 0.320801 | 8.916081     |
| 0.33354  | 0.093822 | 0.318404 | 9.492627     |
| 0.37118  | 0.073365 | 0.252786 | 7.459011     |
| 0.323114 | 0.107356 | 0.299392 | 8.348195     |
| 0.301365 | 0.152534 | 0.335442 | 6.981771     |
